# Supplementary material for: The effect of the conformation of flexible carboxylate ligands on the structures of metal–organic supramolecules
Source: Royal Society of Chemistry journal article supplement (doi:10.1039/c0nj00328j), 2010-01-01
Supplement: c0nj00328j.pdf [file c0nj00328j.pdf]

Supporting Information for

## **The effect of Conformation of Flexible Carboxylate Ligands on the Structures of Metal-Organic Supramolecules**

Fangna Dai,<sup>a</sup> Shuwen Gong,<sup>b</sup> Peipei Cui,<sup>a</sup> Guoqing Zhang,<sup>a</sup> Xiaoliang Qiu,<sup>a</sup> Fei Ye,<sup>a</sup> Daofeng Sun,<sup>\*a</sup> Zhijian Pang,<sup>a</sup> Lei Zhang,<sup>a</sup> Guilin Dong,<sup>a</sup> Changqiao Zhang<sup>\*a</sup>

<sup>a</sup>Key Lab of Colloid and Interface Chemistry, Ministry of Education  
School of Chemistry and Chemical Engineering  
Shandong University, Jinan 250100

<sup>b</sup>Department of Chemistry, Liaocheng University, Liaocheng, 252059, P. R. China.

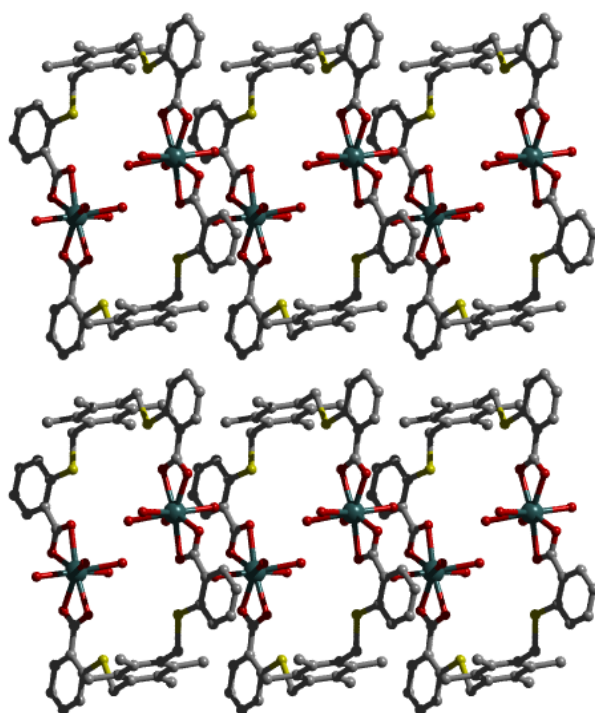

Figure S1. The 3D packing structure of **1** along *a* axis.

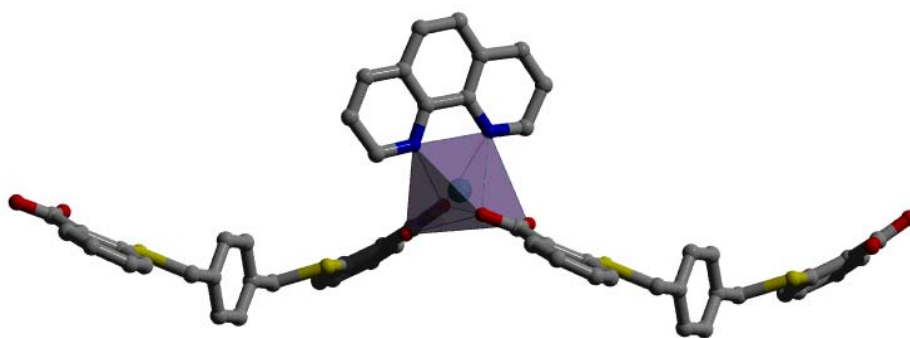

Figure S2. The coordination environment of Zinc ion in **2**.

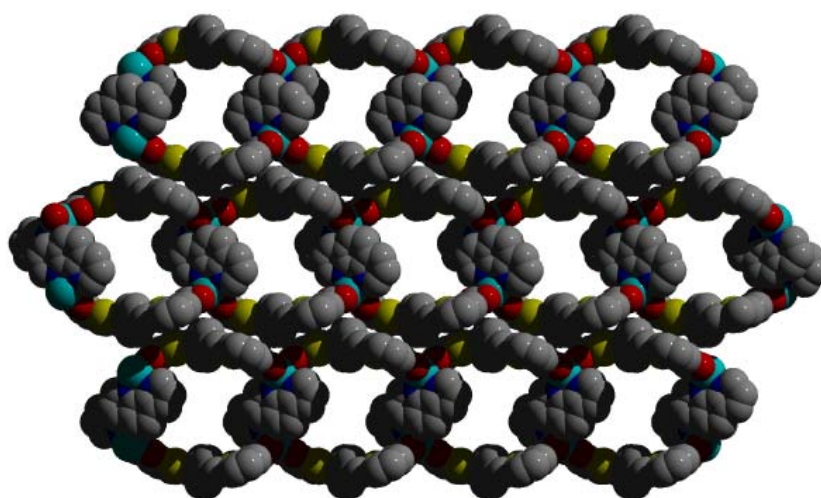

Figure S3. the "rainbow" chain of complex 2.

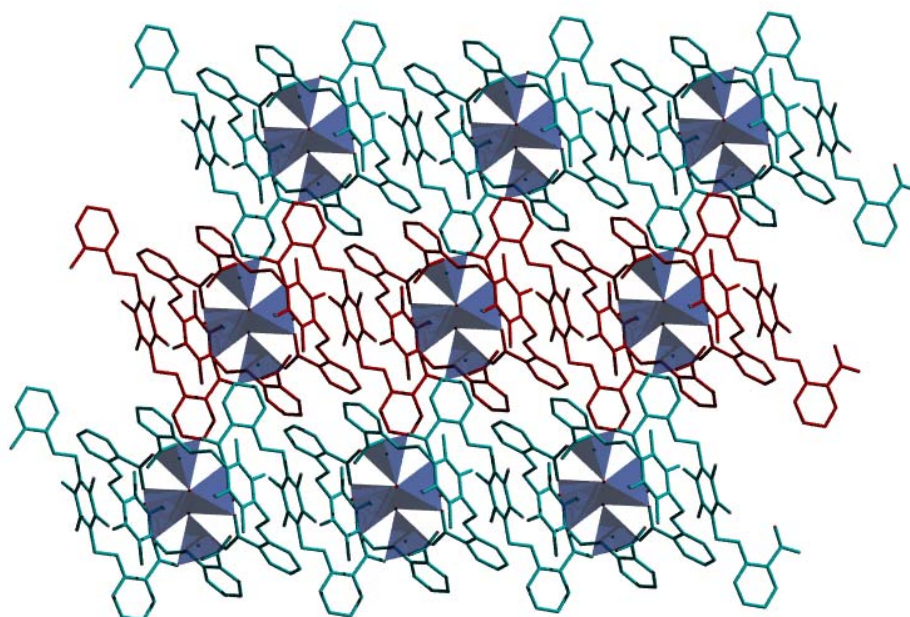

Figure S4. The 3D packing structure of 3..

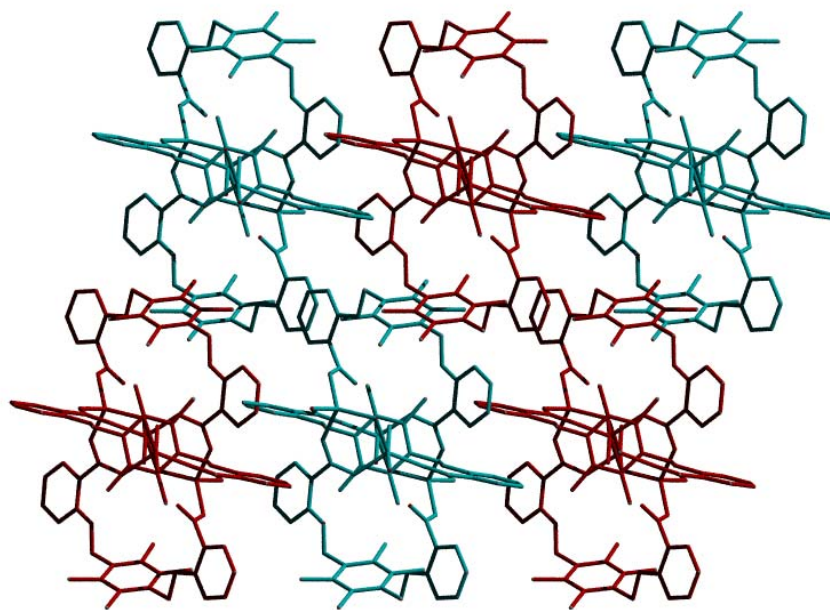

Figure S5. The 3D packing structure of 3. The different layers were shown in different colors.

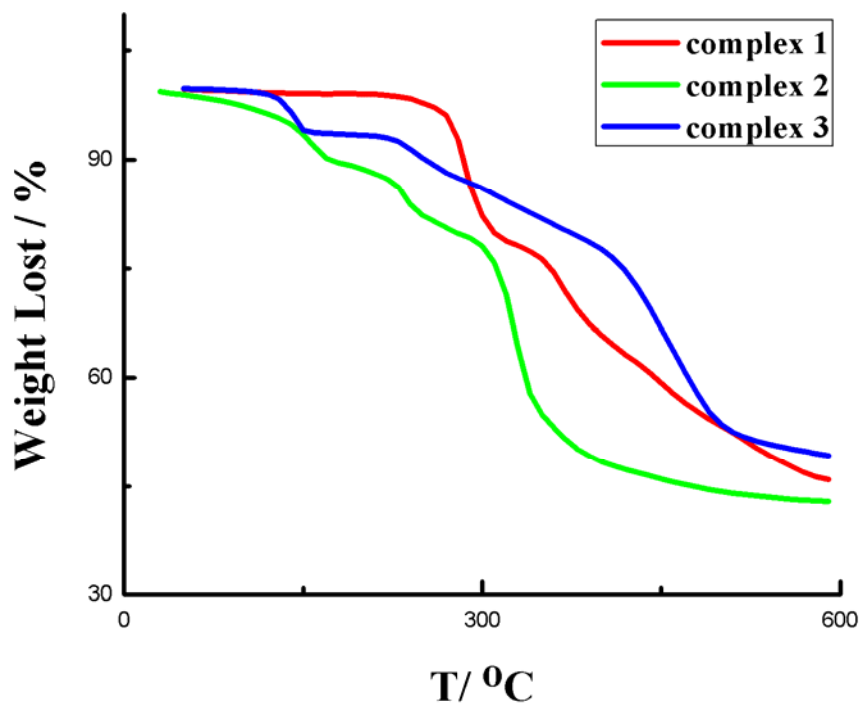

Figure S6. TGA for complexes 1-3.

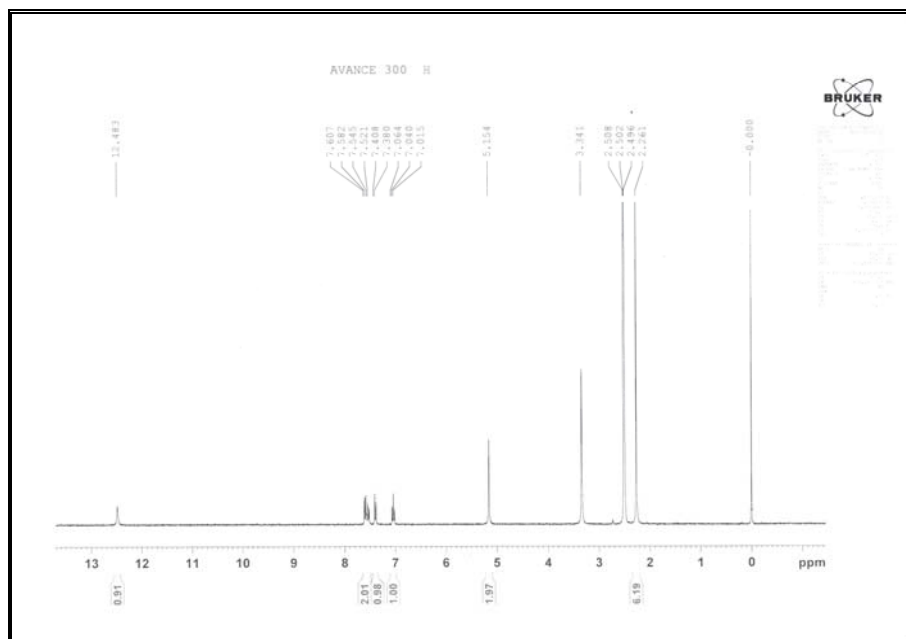

Figure S7. <sup>1</sup>H NMR spectroscopy for ligand **H<sub>2</sub>L<sup>1</sup>**.

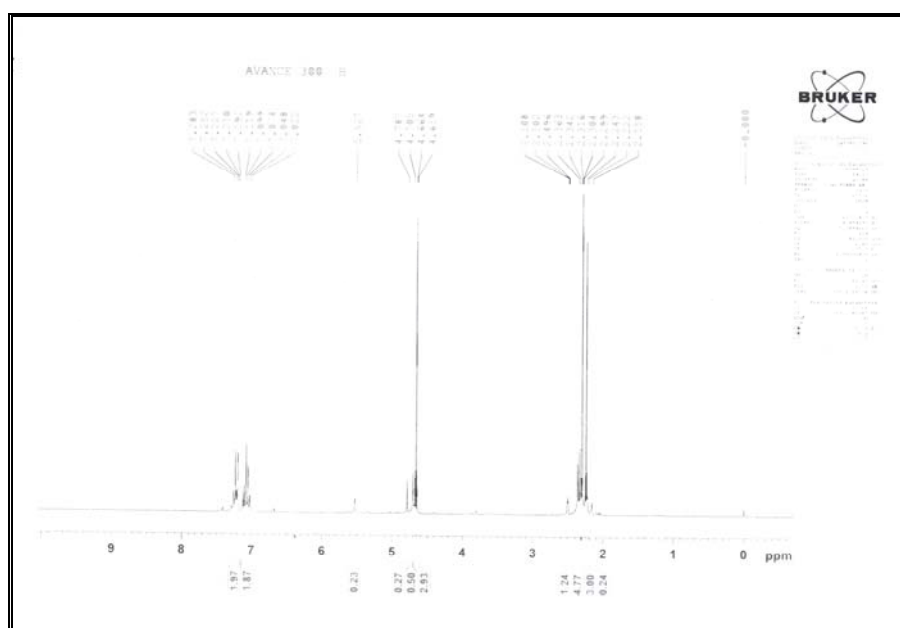

Figure S8. <sup>1</sup>H NMR spectroscopy for ligands **H<sub>2</sub>L<sup>9</sup>**.

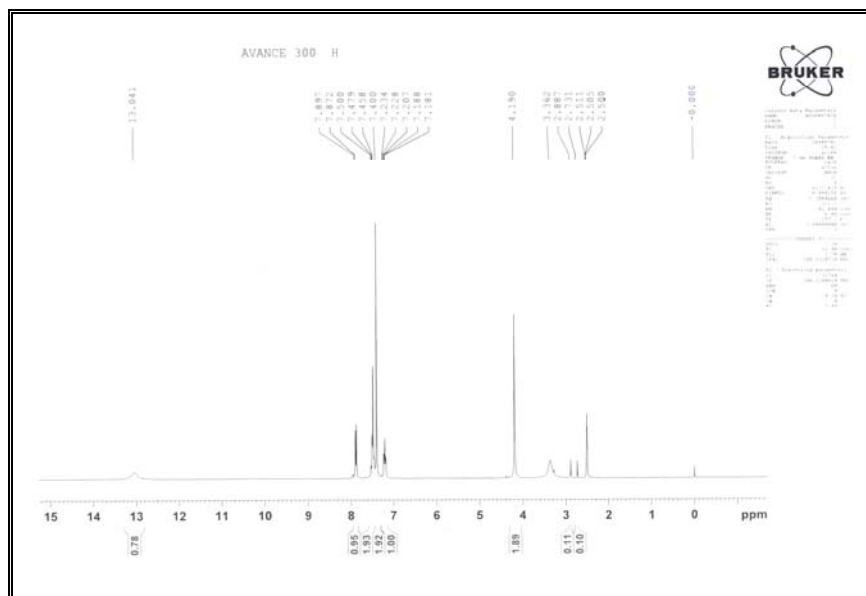

Figure S9.  $^1\text{H}$  NMR spectroscopy for ligands  $\text{H}_2\text{L}^{10}$ .
